# Supplementary material
Source: Springer Nature journal article supplement (https://www.springermedizin.de/resource/supplementary/13054_2011_9392_MOESM4_ESM.pdf/9706102)

Net Cost Saving (£ x1000)

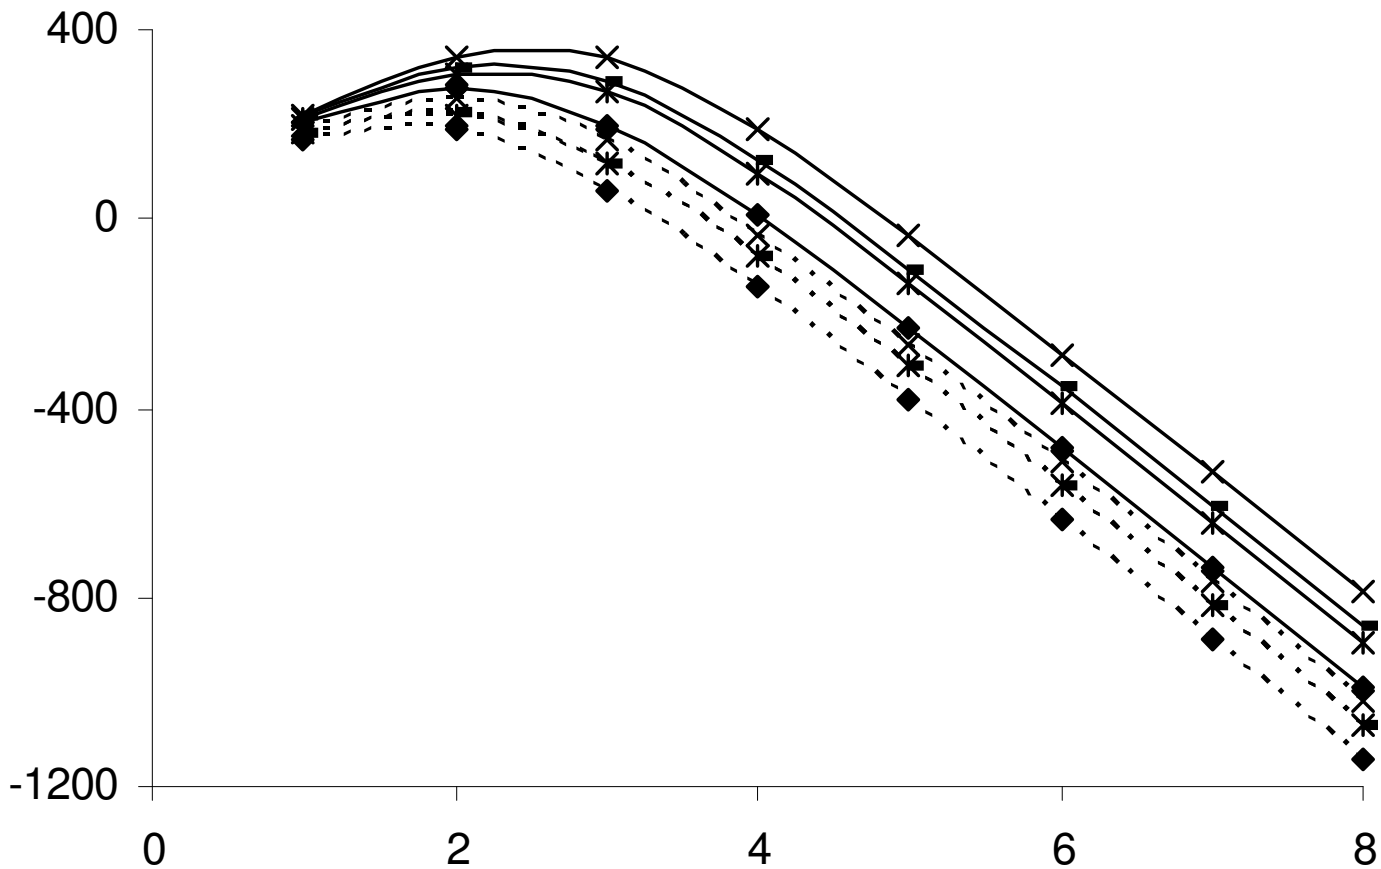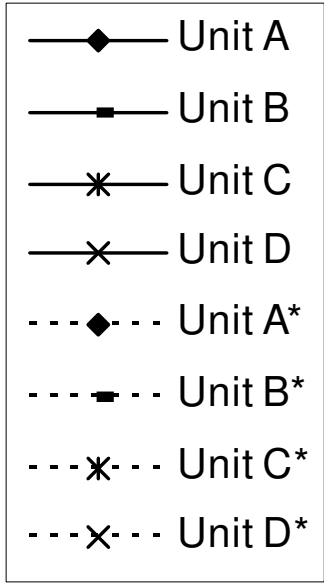

Number of Beds in Unit

Supplement: MOESM4 [file 9706102]
